# Supplementary material
Source: PubMed Central journal article supplement (PMC3486266)
Supplement: JCM.02001-12_zjm999092035so1.pdf [file JCM.02001-12_zjm999092035so1.pdf]

## Supplementary online material

### Russian 'successful' clone B0/W148 of *Mycobacterium tuberculosis* Beijing genotype: multiplex PCR method for rapid detection and global screening

Igor Mokrousov\*, Olga Narvskaya, Anna Vyazovaya, Tatiana Otten, Wei-Wei Jiao, Lia Lima Gomes, Philip N. Suffys, A-Dong Shen, and Boris Vishnevsky

**Table S1:** Characteristics of the studied *M. tuberculosis* DNA collections.

| Genotype                               | Russia, St. Petersburg<br>(n=134) | Russia, Karelia<br>(n=68) | Russia, Pskov<br>(n=70) | Belorussia<br>(n=106) | China<br>(n=55) | Vietnam<br>(n=72) | Brazil<br>(n=11) | TOTAL<br>(n=516) |
|----------------------------------------|-----------------------------------|---------------------------|-------------------------|-----------------------|-----------------|-------------------|------------------|------------------|
| Beijing, IS6110-RFLP and spoligotyped* | 48<br>(10)                        | 43<br>(10)                |                         | 80<br>(42)            | 45              |                   | 11               | 227              |
| Beijing, spoligotyped only*            | 49<br>(18**)                      |                           | 39<br>(7**)             |                       |                 | 37                |                  | 125              |
| Other families, spoligotyped           | 37                                | 25                        | 31                      | 26                    | 10              | 35                |                  | 164              |
| LAM                                    | 15                                | 10                        | 11                      | 12                    | 1               | 1                 |                  | 50               |
| T                                      | 9                                 | 6                         | 6                       | 7                     | 8               | 4                 |                  | 40               |
| EAI                                    |                                   |                           |                         |                       |                 | 24                |                  | 24               |
| Haarlem                                | 8                                 | 3                         | 7                       | 2                     |                 | 2                 |                  | 22               |
| Ural                                   |                                   | 2                         | 4                       | 2                     |                 |                   |                  | 8                |
| Manu2                                  |                                   | 1                         | 1                       | 2                     |                 | 1                 |                  | 5                |
| X                                      | 1                                 |                           |                         | 1                     |                 |                   |                  | 2                |
| S                                      |                                   |                           | 1                       |                       |                 |                   |                  | 1                |
| Clade unknown                          | 4                                 | 3                         | 1                       |                       | 1               | 3                 |                  | 12               |

\* For Beijing strains, in brackets: B0/W148-cluster, based on IS6110-RFLP analysis.

\*\* As detected in this study by multiplex PCR assay.

Spoligoprofiles were assigned to phylogenetic families using SITVITWEB ([http://www.pasteur-guadeloupe.fr:8081/SITVIT\\_ONLINE](http://www.pasteur-guadeloupe.fr:8081/SITVIT_ONLINE)) and SPOTCLUST ([http://tbinsight.cs.rpi.edu/run\\_spotclust.html](http://tbinsight.cs.rpi.edu/run_spotclust.html)) online tools.
